# Supplementary material for: Effects of Different Corticosteroid Doses in Elderly Unvaccinated Patients with Severe to Critical COVID-19
Source: MDPI journal article supplement (doi:10.3390/life12111924), 2022-11-18
Supplement: s1 [file s1]

**Supplementary Table S1:** Difference in days from hospital admission to clinical outcome according prednisone equivalent dose.

| Prednisone Equivalent<br>Use (mg/kg) | Dismissed patients |       |       | Deceased or IOT patients |       |      |
|--------------------------------------|--------------------|-------|-------|--------------------------|-------|------|
|                                      | Mean               | SD    | p     | Mean                     | SD    | p    |
| < 1                                  | 19.78              | 5.43  | 0.038 | 20.00                    | 10.25 | 0.33 |
| ≥ 1                                  | 29.17              | 12.49 |       | 26.57                    | 13.09 |      |

Data are presented as mean value± standard deviation (SD).
